# Supplementary material
Source: PubMed Central journal article supplement (PMC4718902)
Supplement: NIHMS725169-supplement-1.pdf [file NIHMS725169-supplement-1.pdf]

**Methionine and S-Adenosylmethionine levels are critical  
regulators of PP2A activity  
modulating lipophagy during steatosis**

Imanol Zubiete-Franco<sup>1#</sup>, Juan Luis García-Rodríguez<sup>1#</sup>, Maite Martínez-Uña<sup>2</sup>, Nuria Martínez-Lopez<sup>1</sup>, Ashwin Woodhoo<sup>1,4</sup>, Virginia Gutiérrez-De Juan<sup>1</sup>, Naiara Beraza<sup>1,4</sup>, Sergio Lage-Medina<sup>3</sup>, Fernando Andrade<sup>3</sup>, Marta Llarena Fernandez<sup>3</sup>, Luis Aldámiz-Echevarría<sup>3</sup>, David Fernández-Ramos<sup>1</sup>, Juan Manuel Falcon-Perez<sup>1,4</sup>, Fernando Lopitz-Otsoa<sup>1</sup>, Pablo Fernandez-Tussy<sup>1</sup>, Lucía Barbier-Torres<sup>1</sup>, Zigmund Luka<sup>6</sup>, Conrad Wagner<sup>6</sup>, Carmelo García-Monzón<sup>5</sup>, Shelly C.Lu<sup>7</sup>, Patricia Aspichueta<sup>2</sup>, José María Mato<sup>1</sup>, **María Luz Martínez-Chantar<sup>1, 8</sup>◆\***, **Marta Varela-Rey<sup>1</sup>◆\***.

**Supplementary Table 1:** Specifications of the Methionine deficient diet (Ssniff® EF R/M acc. AIN 76A 0.15% L-methionine).

| <b>(SSNIFF, Soest, Germany)</b>                       |                              |
|-------------------------------------------------------|------------------------------|
| <b>ssniff® EF R/M acc. AIN 76A 0.15% L-methionine</b> |                              |
|                                                       | <b>Minerals [%]</b>          |
| Calcium                                               | 0.63                         |
| Phosphorus                                            | 0.55                         |
| Sodium                                                | 0.11                         |
| Magnesium                                             | 0.05                         |
| Potassium                                             | 0.36                         |
| Ca:P                                                  | 1.14                         |
|                                                       | <b>Fatty acids [%]</b>       |
| C 8:0                                                 | ---                          |
| C10:0                                                 | ---                          |
| C12:0                                                 | ---                          |
| C14:0                                                 | 0.01                         |
| C16:0                                                 | 0.57                         |
| C16:1                                                 | 0.01                         |
| C18:0                                                 | 0.1                          |
| C18:1                                                 | 1.31                         |
| C18:2                                                 | 2.77                         |
| C18:3                                                 | 0.05                         |
| C20:0                                                 | 0.02                         |
| C20:1                                                 | ---                          |
| C20:5                                                 | ---                          |
| C22:6                                                 | ---                          |
|                                                       | <b>Amino acids [%]</b>       |
| Lysine 1.43                                           | 1.43                         |
| Methionine                                            | 0.15                         |
| Cystine                                               | 0.08                         |
| Met+Cys                                               | 0.9                          |
| Threonine                                             | 0.77                         |
| Tryptophan                                            | 0.22                         |
| Arginine                                              | 0.63                         |
| Histidine                                             | 0.55                         |
| Valine                                                | 1.18                         |
| Isoleucine                                            | 0.9                          |
| Leucine                                               | 1.7                          |
| Phenylalanine                                         | 0.93                         |
| Phe+Tyr                                               | 1.85                         |
| Glycine                                               | 0.36                         |
| Glutamic acid                                         | 3.9                          |
| Aspartic acid                                         | 1.29                         |
| Proline                                               | 2                            |
| Alanine                                               | 0.57                         |
| Serine                                                | 1.03                         |
|                                                       | <b>Vitamins per kg</b>       |
| Vitamin A                                             | 4,000 IU                     |
| Vitamin D3                                            | 1,000 IU                     |
| Vitamin E                                             | 57 mg                        |
| Vitamin K (as menadione)                              | 5 mg                         |
| Vitamin C                                             | ---- mg                      |
| Thiamin (B1)                                          | 3 mg                         |
| Riboflavin (B2)                                       | 5 mg                         |
| Pyridoxine (B6)                                       | 6 mg                         |
| Cobalamin (B12)                                       | 10 µg                        |
| Nicotinic acid                                        | 29 mg                        |
| Pantothenic acid                                      | 15 mg                        |
| Folic acid                                            | 2 mg                         |
| Biotin                                                | 20 µg                        |
| Choline-Chloride                                      | 1,040 mg                     |
|                                                       | <b>Trace elements per kg</b> |
| Iron                                                  | 46 mg                        |
| Manganese                                             | 59 mg                        |
| Zinc                                                  | 35 mg                        |
| Copper                                                | 7 mg                         |
| Iodine                                                | 0.22 mg                      |
| Selenium                                              | 0.14 mg                      |
| Cobalt                                                | 0.02 mg                      |
|                                                       | <b>Crude Nutrients [%]</b>   |
| Dry matter                                            | 96.8                         |
| Crude protein (N x 6.25)                              | 17.4                         |
| Crude fat                                             | 5.1                          |
| Crude fibre                                           | 5                            |
| Crude ash                                             | 2                            |
| N free extracts                                       | 67.4                         |
| Starch                                                | 13.9                         |
| Sugar                                                 | 51                           |
|                                                       | <b>Energy [MJ/kg]</b>        |
| Gross Energy (GE)                                     | 19                           |

**Supplementary Table 2: Specifications and conditions of the antibodies used.**

| <b>Antibody</b>      | <b>Supplier</b>            | <b>Western blot</b> | <b>Immunofluorescence</b> | <b>Cat. N</b> |
|----------------------|----------------------------|---------------------|---------------------------|---------------|
| $\beta$ -ACTIN       | SIGMA                      | 1/5000              | -                         | A 5315        |
| $\alpha$ -TUBULIN    | Abcam                      | -                   | 1/100                     | Ab18251       |
| ATG3                 | Cell Signaling Technology  | 1/1000              | -                         | 3415          |
| ATG5                 | Cell Signaling Technology  | 1/1000              | -                         | 8540          |
| ATG7                 | Cell Signaling Technology  | 1/1000              | -                         | 2631          |
| ATG12                | Cell Signalling Technology | 1/1000              | -                         | 4180          |
| BECLIN1              | Cell Signalling Technology | 1/1000              | -                         | 3495          |
| GAPDH                | Abcam                      | 1/1000              | -                         | Ab8245        |
| LC3                  | Cell Signalling Technology | 1/1000              | 1/50                      | 2775          |
| pS6 (Ser 235/236)    | Cell Signalling Technology | 1/1000              | -                         | 4857          |
| S6 Ribosomal protein | Cell Signalling Technology | 1/1000              | -                         | 2317          |
| 4E-BP1 (53H11)       | Cell Signalling Technology | 1/1000              | -                         | 9644          |
| 4E-BP1               | Cell Signalling Technology | 1/1000              | -                         | 9452          |
| p4E-BP1              | Cell Signalling Technology | 1/1000              | -                         | 9451          |
| pMTOR (Ser 2448)     | Cell Signalling Technology | 1/1000              | -                         | 2971          |
| MTOR                 | Cell Signalling Technology | 1/1000              | -                         | 2983          |
| LAMP2                | Abcam                      | 1/1000              | 1/100                     | Ab13524       |
| Methyl-PP2A          | Upstate                    | 1/100               |                           | 05546         |
| Demethylated PP2A    | Upstate                    | 1/1000              |                           | 05577         |
| PP2A A Subunit       | Upstate                    | 1/1000              |                           | 7250          |
| LAMP2                | Abcam                      | 1/1000              | 1/100                     | Ab13524       |

## **Material and Methods**

**PP2A C Subunit Methylation Assay.** Hepatocytes were pre-treated with 3-Deazaadenosine (Deaza) (20  $\mu$ M) during 6h, and then cultured in SAME and methionine supplemented medium during 12h. 20  $\mu$ l of protein lysate (1  $\mu$ g/ $\mu$ l) were treated with either 50  $\mu$ l of preneutralized base solution (80 mM NaOH, 80 mM HCl, and 200 mM Tris pH 6.8) or with 20  $\mu$ l of base (200 mM NaOH) during 20 minutes to completely demethylate PP2Ac and then neutralized with 30  $\mu$ l of neutralization buffer (133.3 mM HCl and 333.3 mM Tris pH 6.8). Samples were compared by immunoblot using unmethylated PP2A antibody (Upstate). Percentage of PP2A methylation was calculated by subtracting the densitometry value of unmethylated PP2A normalized with Actin, in the sample treated with base solution by the densitometry value in the control sample. Percentage was calculated by considering WT control samples as 100%.

**Gene Silencing.** Primary hepatocytes were transfected with 84 nM of each small interfering RNA (siRNA) constructs (SIGMA, SASI\_Mm01\_00126453 for PP2A catalytic subunit  $\beta$ , and SASI\_Mm01\_00038232 for PP2A catalytic subunit  $\alpha$ ) using DharmaFECT Transfection Reagent (Dharmacon). MLP cells were transfected with 100 nM of each small interfering RNA (siRNA) using Lipofectamine 2000 (Invitrogen). In both cell types, transfection was done twice during a 48-hour period (once every 24 hours). Silencing mix was left overnight, and afterwards, the cultured medium was replaced with fresh medium.

**Caspase-3 activity.** Caspase-3 activity was assayed by using a fluorescent substrate (Ac-DEVD-AFC) (Enzo Life Sciences). Hepatocytes were homogenized in 200  $\mu$ l of lysis buffer (10 mM HEPES, 0.1% CHAPS, 2mM EDTA, 5mM dithiothreitol). 30  $\mu$ g of protein lysates were incubated with 2.5  $\mu$ l of Ac-DEVD-AFC in 500  $\mu$ l of reaction buffer (10 mM PIPES pH 7.4, 2 mM EDTA pH8, 0.1% of CHAPS and 5mM of dithiothreitol) at 37°C. Enzymatic activity was measured at time 0 and after 2 hours

in a luminescence spectrophotometer at an excitation of 390 nm and emission of 510 nm.

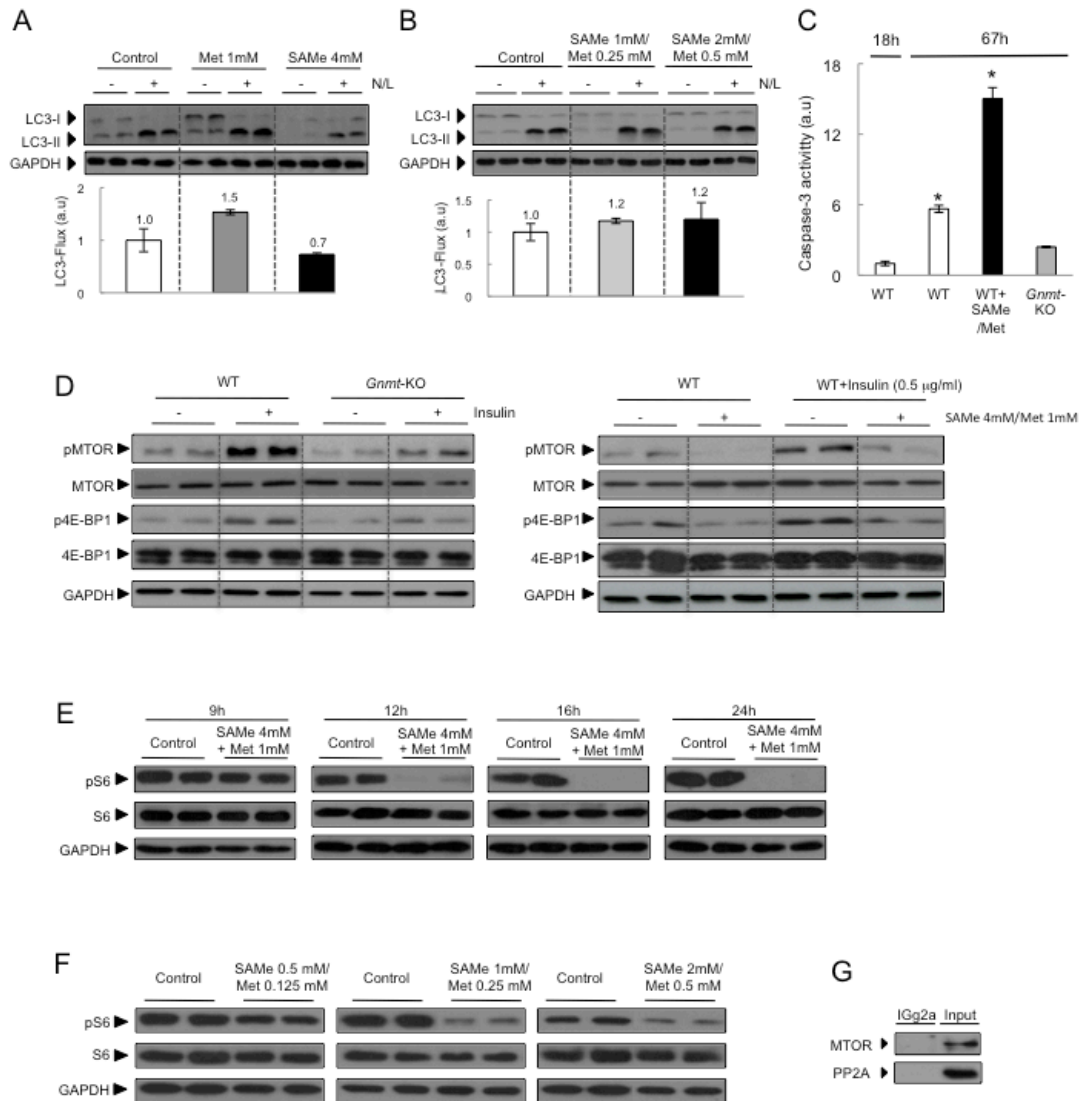

**Supplementary Figure 1: Methionine and SAME effect on MTOR activity and autophagy flux.** (A,B) Hepatocytes were treated with SAME and methionine during 24h. When indicated, hepatocytes were incubated in the presence or absence of N/L for the last 4 hours of culture and LC3 levels were analyzed by WB. (C) Hepatocytes were cultured the indicated times in the presence or absence of SAME (4mM) and methionine (1mM). Then the activity of Caspase-3 was analyzed (as described in supplementary Material and Methods). (D) After seeding, hepatocytes were medium changed, and treated when indicated with SAME and methionine during 18h. Then hepatocytes were treated for 20 minutes with insulin (0.5mg/ml). (E) Hepatocytes cultured with SAME and methionine at the indicated times. (F) Hepatocytes were cultured with SAME and methionine at the indicated doses during 16h. (G) WB analysis of PP2A and MTOR in control (IgG2a) and MTOR-immunoprecipitated extracts from WT hepatocytes. Data are represented as mean +/- SEM (\*p<0.05 N/L Vs. Control).

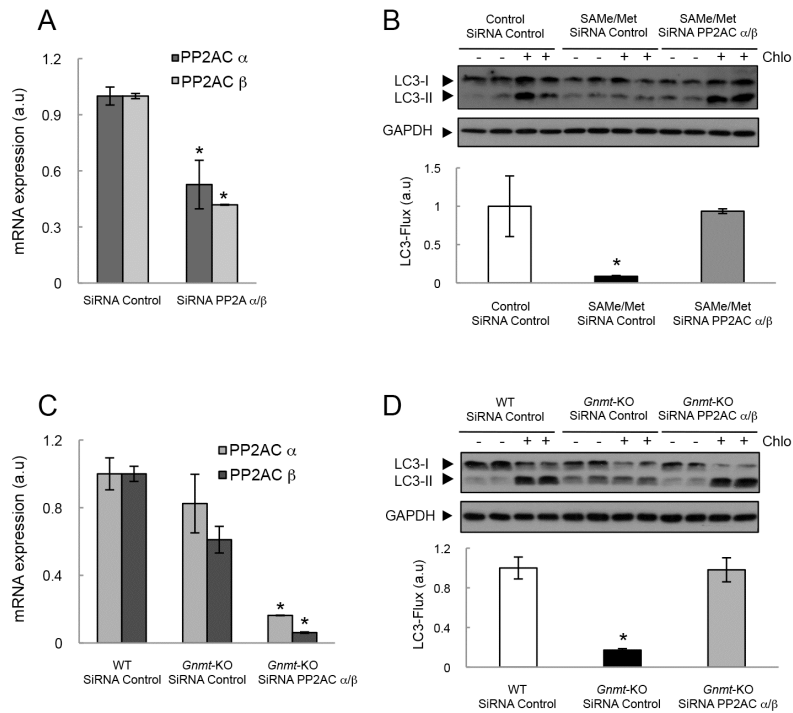

**Supplementary Figure 2: PP2A silencing effect on autophagy flux.** (A,B) MLP-29 cells were co-transfected twice during 48h every 24h, with siRNA constructs for PP2A catalytic subunit  $\alpha$ , and for PP2A catalytic subunit  $\beta$  (as described in supplementary Material and Methods). (A) Transfection efficiency was studied by analyzing the mRNA levels of *PP2A catalytic subunit  $\alpha$*  and *subunit  $\beta$*  and values were normalized with *GAPDH* mRNA expression. (B) After silencing, MLP cells were medium changed, treated with SAME and methionine during 18h, and then incubated with chloroquine for the last 6 hours of culture. (C,D) Hepatocytes were co-transfected twice during 44h every 22h, with siRNA constructs for PP2A catalytic subunit  $\alpha$  and the PP2A catalytic subunit  $\beta$  (as described in supplementary Material and Methods). After silencing, hepatocytes were medium changed, and incubated with chloroquine during 4 hours. (C) mRNA expression levels of *PP2A catalytic subunit  $\alpha$*  and  *$\beta$*  were normalized with *18S* ribosomal RNA expression. (D) LC3 levels were analyzed by WB. Data are represented as mean  $\pm$  SEM (\* $p < 0.05$  N/L Vs. Control).

**A**

| Mouse Genotype | Met (pmol/mg) | SAMe (pmol/mg) | SAH (pmol/mg) | AST (U/L) | ALT (U/L) | TG (nmol/mg prot) |
|----------------|---------------|----------------|---------------|-----------|-----------|-------------------|
| WT             | 86.6 ± 11.3   | 72.9 ± 3.5     | 8.3 ± 0.9     | 51 ± 2    | 26 ± 0.3  | 43.3 ± 6.7        |
| WT + MDD       | 52.6* ± 10.0  | 47.0* ± 4.0    | 15.7* ± 0.8   | 54 ± 2    | 15* ± 1   | 37.7 ± 7.1        |

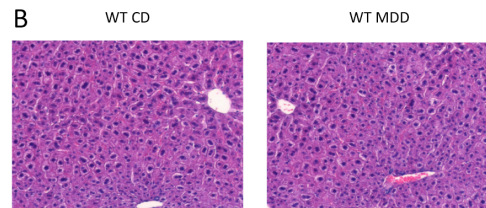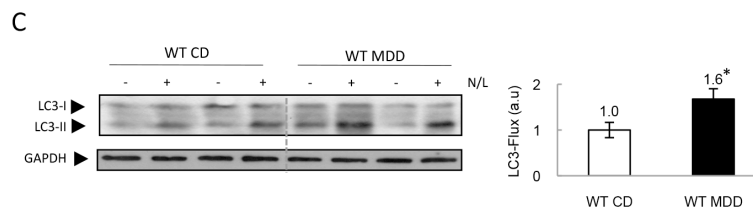

**Supplementary Figure 3: Effect of Methionine Deficient Diet (MDD) in WT livers.** (A) Hepatic SAMe, methionine, SAH, TG and serum transaminases levels from WT mice fed with a normal diet or MDD. (B) Haematoxylin/Eosin staining of WT mice fed with a normal diet or MDD. (C) WB analysis showing LC3-flux in liver sections, obtained from WT mice fed with a normal diet or MDD, which were incubated during 2h in the presence or absence of protease inhibitor leupeptin (200  $\mu$ M) and ammonium chloride (40 mM). Data are represented as mean  $\pm$  SEM of at least duplicate experiments (t-test, \* $p < 0.05$  Group Vs. WT).
